# Supplementary material for: Dynamically reversible cooperation and interaction of multiple rotating micromotors
Source: Royal Society of Chemistry journal article supplement (doi:10.1039/d3lc00108c), 2023-01-01
Supplement: d3lc00108c1.pdf [file d3lc00108c1.pdf]

## Supplementary Information

### Dynamically Reversible Cooperation and Interaction of Multiple Rotating Micromotors

*Shilu Zhu,<sup>a</sup> Yifan Cheng,<sup>a</sup> Jialong Chen,<sup>b</sup> Guangli Liu,<sup>a</sup> Tingting Luo,<sup>a</sup> and Runhuai Yang<sup>\*a</sup>*

<sup>a</sup>School of Biomedical Engineering, 3D-Printing and Tissue Engineering Center, Anhui Medical University, Hefei 230032, China

<sup>b</sup>College & Hospital of Stomatology, Anhui Medical University, Key Lab. of Oral Diseases Research of Anhui Province, Hefei, 230032, China

Correspondence: Runhuai Yang ( [yangrunhuai@ahmu.edu.cn](mailto:yangrunhuai@ahmu.edu.cn) )

#### Supplementary videos

**Video S1:** State change from cooperation to interaction of two micromotors (7 Hz to 8 Hz).

**Video S2:** Temporal separation when the frequency was changed below the state-change frequency range.

**Video S3:** Different combinations of two micromotors interacting at 12 Hz.

**Video S4:** Reversible transformation between interactive and cooperative behaviors.

**Video S5:** Interactive mode of different combinations of three micromotors under different frequencies.

**Video S6:** Reversible switching between different patterns of three micromotors indicated in **Fig. 5**.

**Video S7:** Diverse stable patterns of interactive behavior of different number and size of micromotors.

**Video S8:** Dynamic switching between interactive and cooperative behaviors of one 450  $\mu\text{m}$  and four 300  $\mu\text{m}$  micromotors.

**Video S9:** Dynamic self-organization of micromotors into hexagons and triangles.

## Supplementary Figures

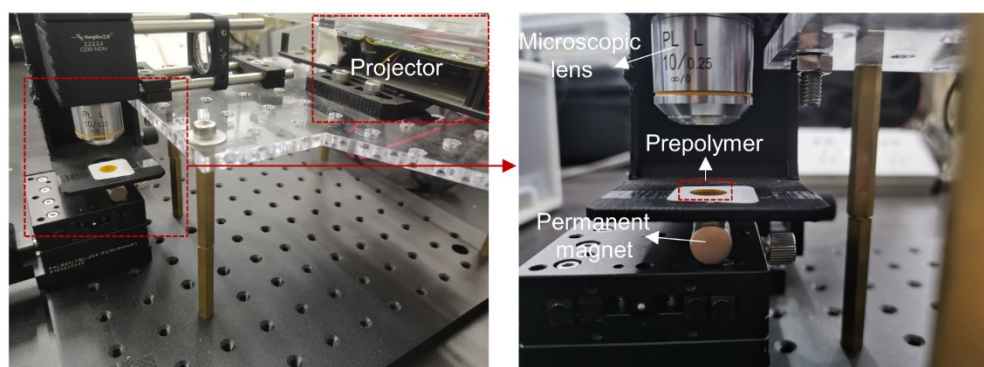

**Fig. S1** The self-built digital light printing platform for micromotor fabrication in this work.

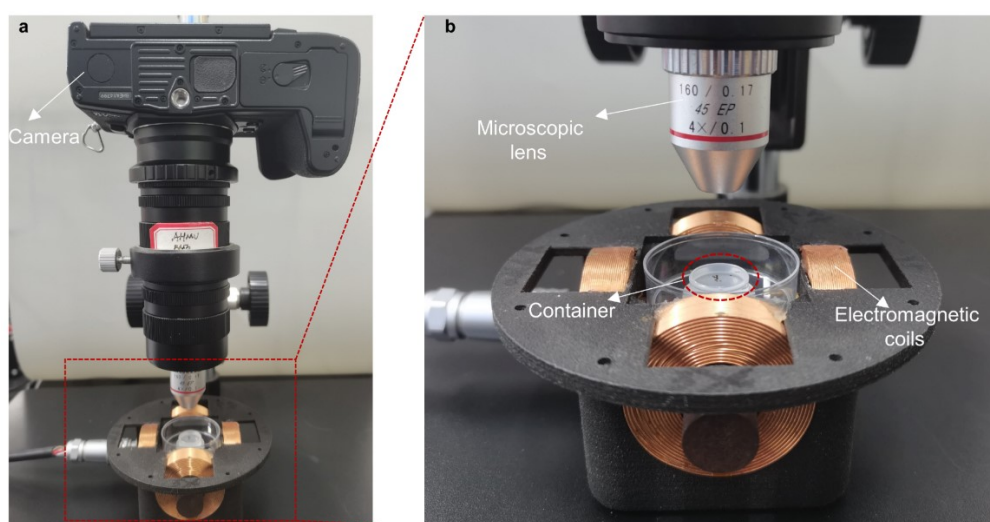

**Fig. S2** Electromagnetic coil system for magnetic actuation and video recording.

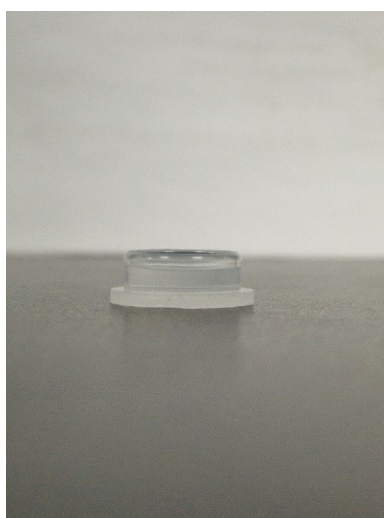

**Fig. S3** The concave air-water interface of the container (diameter: 12.5 mm) in our experiments.

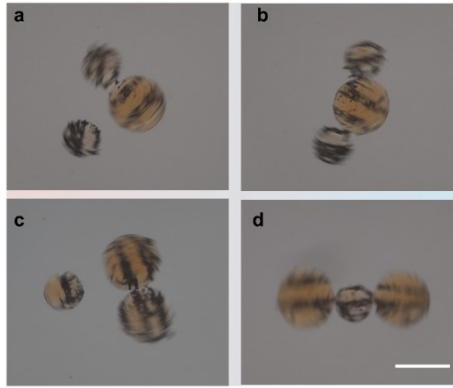

**Fig. S4 a, b** Another possible assembly of pattern III and IV in Fig. 4a, respectively. **c, d** Another possible assembly of pattern III and IV in Fig. 4b. Scale bar: 450  $\mu\text{m}$ .

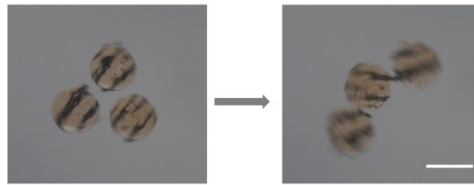

**Fig. S5** The three micromotors form a nonlinear structure with certain bending angle when the frequency is directly reduced from a higher value to a lower value. Scale bar: 450  $\mu\text{m}$ .
